# Supplementary material
Source: PubMed Central journal article supplement (PMC6302940)
Supplement: jciinsight-3-121932-s071.pdf [file jciinsight-3-121932-s071.pdf]

Sup Figure 1

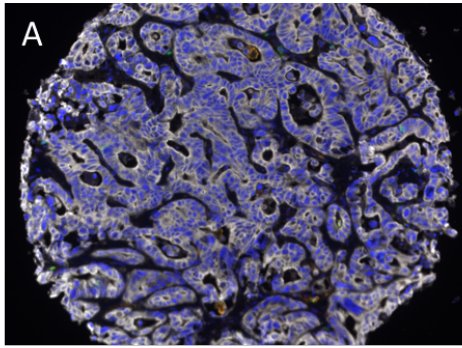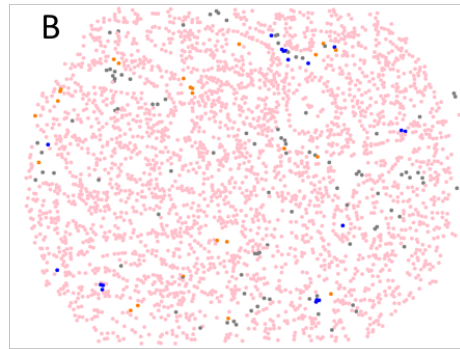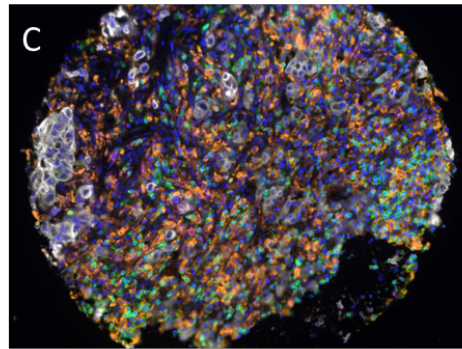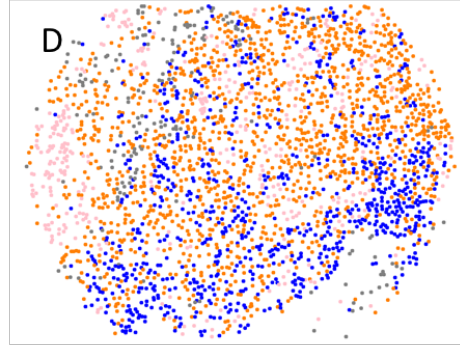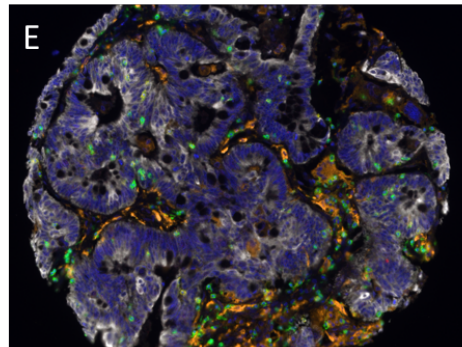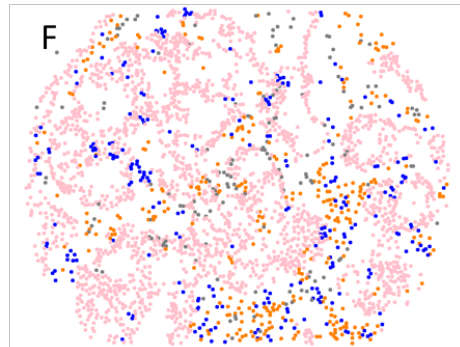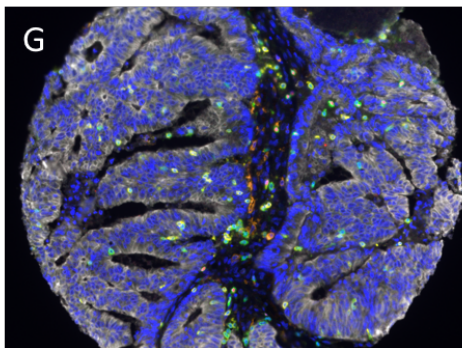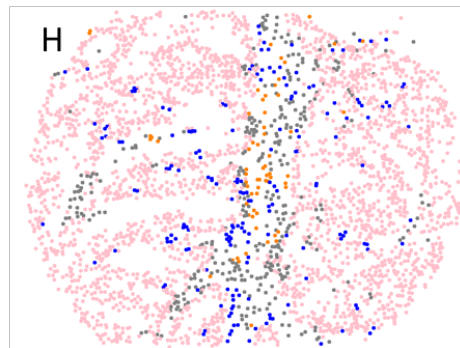

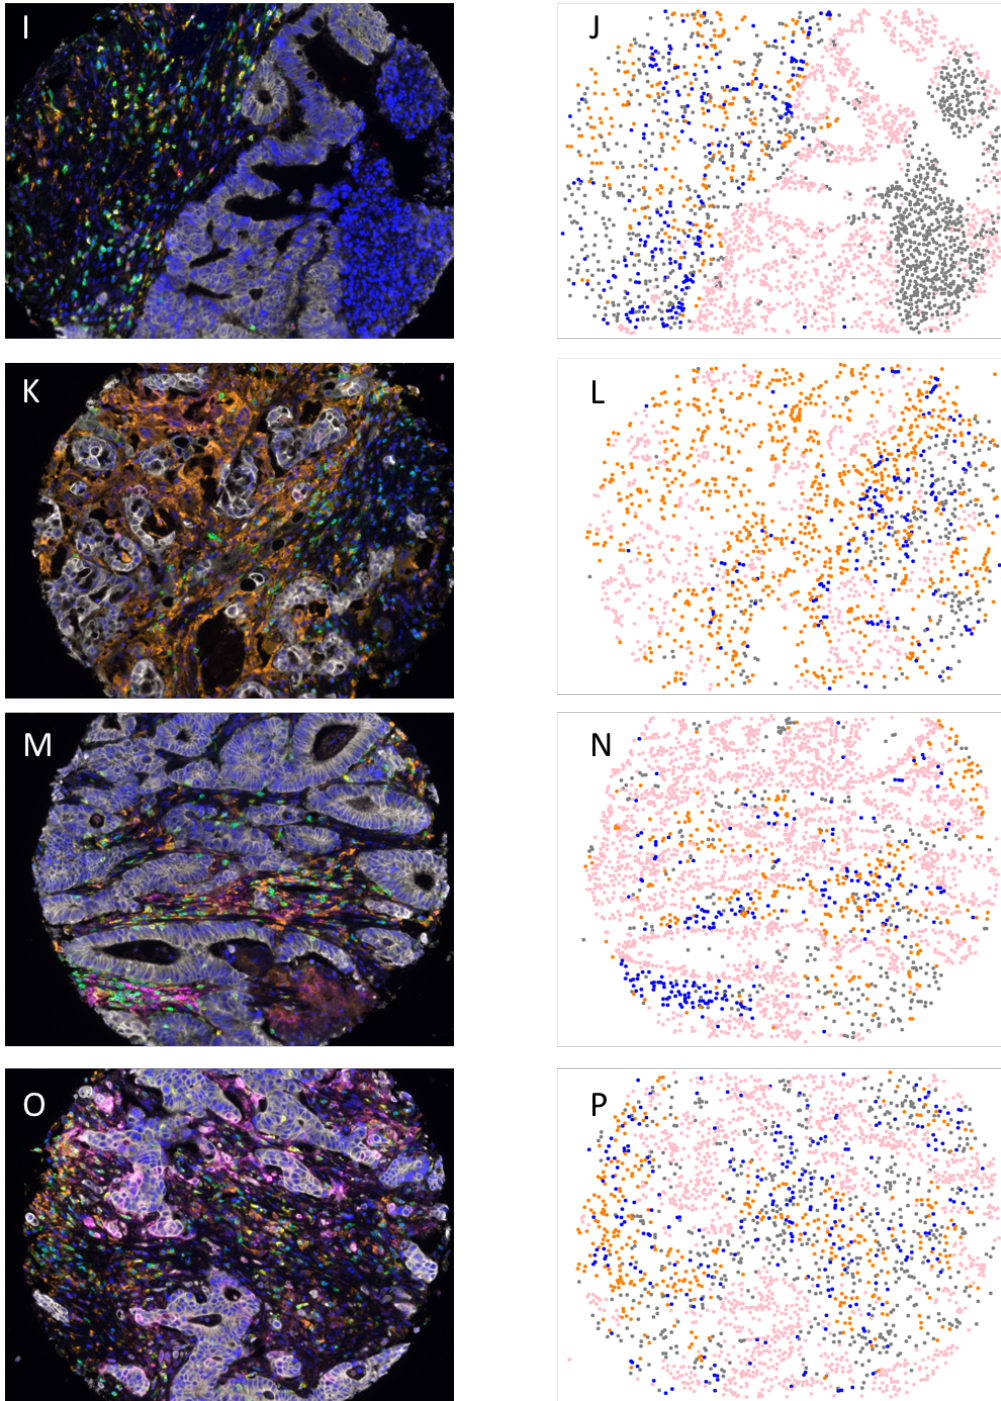

Supplemental Figure 1: *The immune infiltrate of colorectal liver metastases (CRLM) is heterogeneous.* Multiplex fluorescent immunohistochemistry (mIHC) and immune cell phenotyping was applied to samples from 177 patients with resected CRLM (20x magnification)(white – epithelial tumor cell (EC), green – helper T cell, yellow – cytotoxic T lymphocyte (CTL), red – T<sub>reg</sub>, orange – antigen presenting cell (APC), magenta – PD-L1). Immune infiltrates varied from (A,B) relatively devoid of immune cells to (C,D) high infiltration. Predominant cell types included (E,F) helper T cells, (G,H) cytotoxic T lymphocytes (CTLs), (I,J) T<sub>regs</sub>, (K,L) APCs, (M,N) PD-L1<sup>+</sup>APCs and (O,P) PD-L1<sup>+</sup> epithelial cells (ECs).

## Sup Figure 2

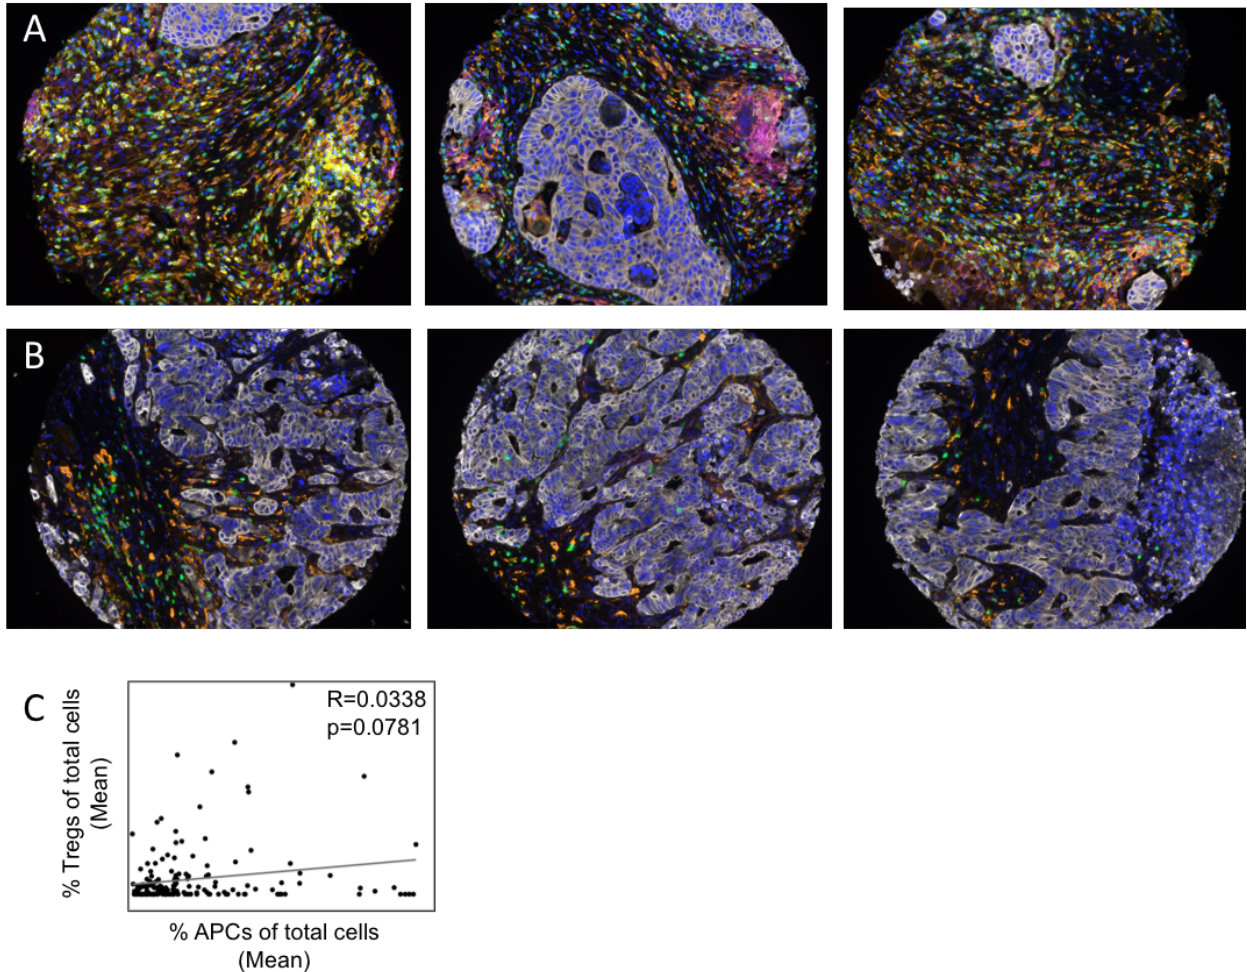

Supplemental Figure 2: *Intra-tumoral heterogeneity varied amongst patients.* Intra-tumoral heterogeneity varied with some patients displaying great differences between cores (A) while other remained relatively consistent (B) (20x magnification)(white – epithelial cell (EC), green – helper T cell, yellow – cytotoxic T lymphocyte (CTL), red –  $T_{reg}$ , orange – antigen presenting cell (APC), magenta – PD-L1). (C) Lack of correlation between antigen presenting cells (APC) and  $T_{reg}$  infiltration confirms that associations with cytotoxic T lymphocytes (CTLs) are not due to non-specific increase in immune cell infiltration.

## Sup Figure 3

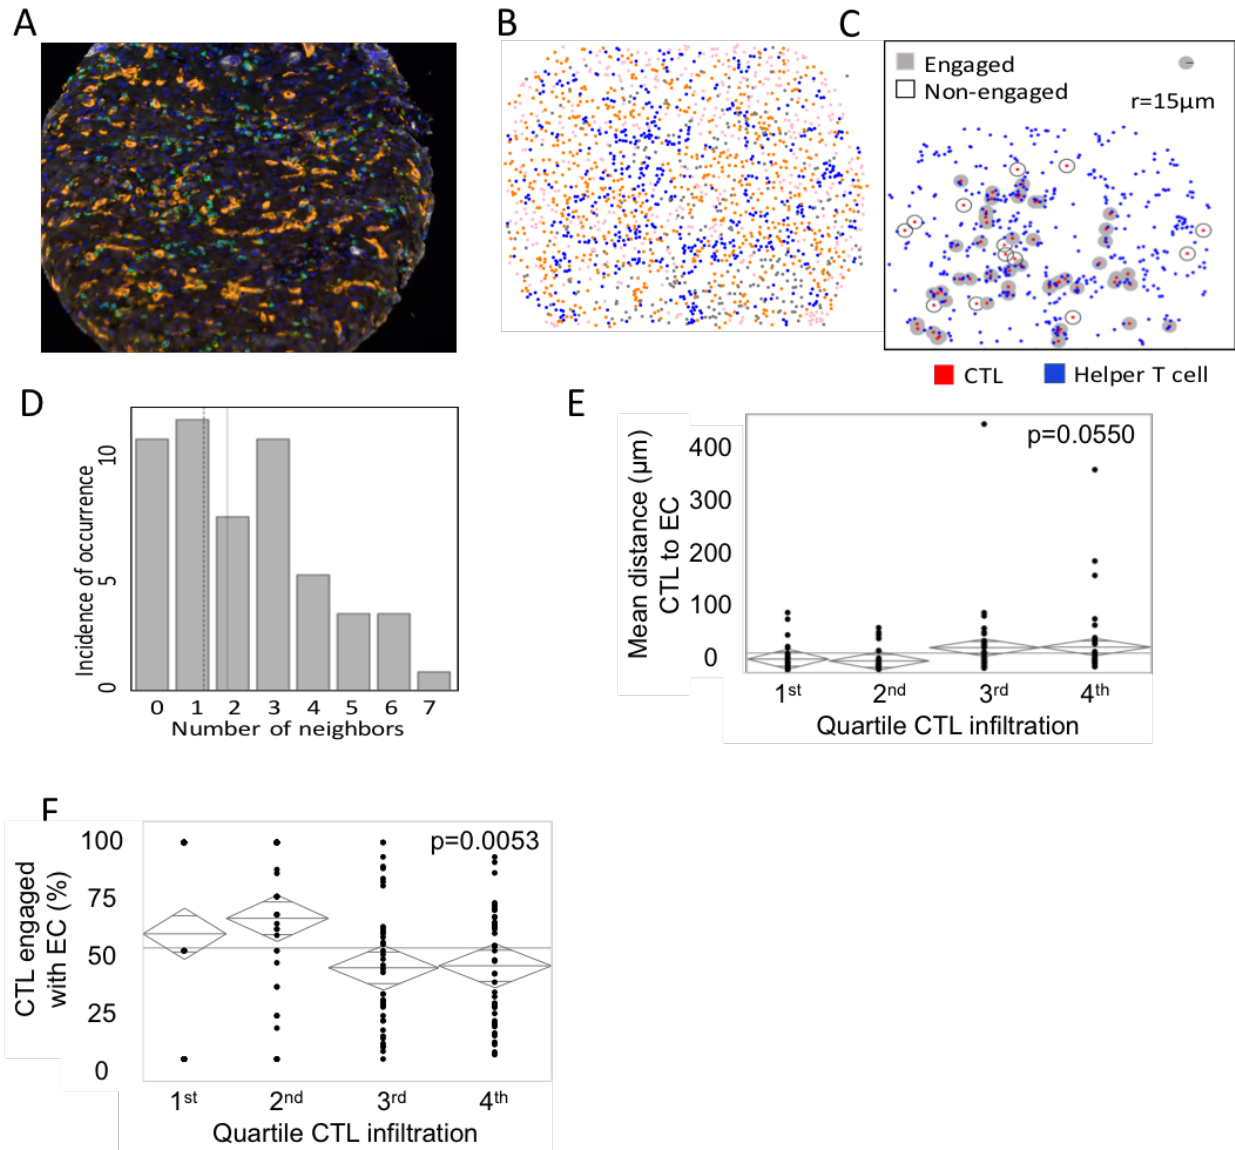

Supplemental Figure 3: *Degree of infiltration had a paradoxical effect on engagement and intercellular distance.* After multiplex fluorescent immunohistochemistry (mIHC) (A), cells were phenotyped (B) and assigned coordinates. (C) Frequency of engagement of cytotoxic T lymphocytes (CTLs) and helper T cells determined for each core. (D) Mean number of neighbors per engaged cell is calculated. (E,F) To confirm that differences in CTL/epithelial cell (EC) engagement and intercellular distances was not simply a marker for increased infiltration, patients were divided into quartiles from lowest (1<sup>st</sup> quartile) to highest (4<sup>th</sup> quartile) CTL infiltration. Paradoxically, samples with the greatest concentration of CTLs tended to have greater intercellular distances (E) and less EC engagement (F).

Sup Figure 4

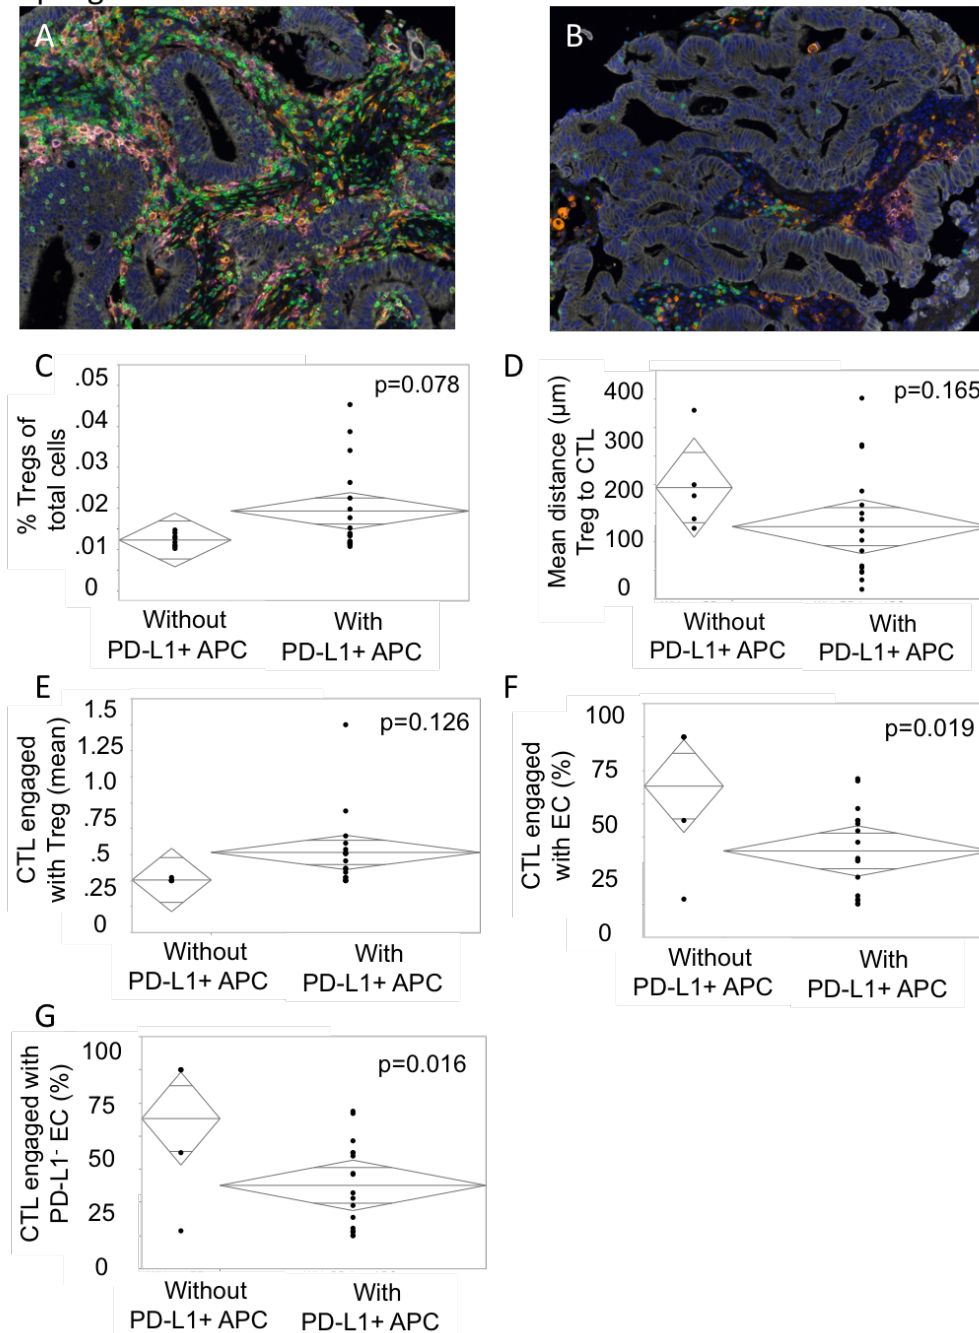

Supplemental Figure 4: *Validation of the impact of PD-L1<sup>+</sup> antigen presenting cells (APCs) on the immune microenvironment using an independent cohort.* To validate our findings, an independent cohort was created consisting of 19 patient samples representing colorectal metastases to liver (n=9), lung (n=7) and bone (n=3). Variability of PD-L1<sup>+</sup>APC infiltration was again seen with abundance in some (A; n=11) and absence in others (B; n=8). Similar to our findings in the larger cohort, presence of PD-L1<sup>+</sup>APCs was associated with a trend towards increased T<sub>reg</sub> infiltration (C) which tended to closer (D) and more engaged (E) with cytotoxic T lymphocytes (CTLs). They further shaped the microenvironment by decreasing CTL engagement with epithelial cells (ECs) and in particular PD-L1<sup>-</sup>ECs.

## Sup Figure 5

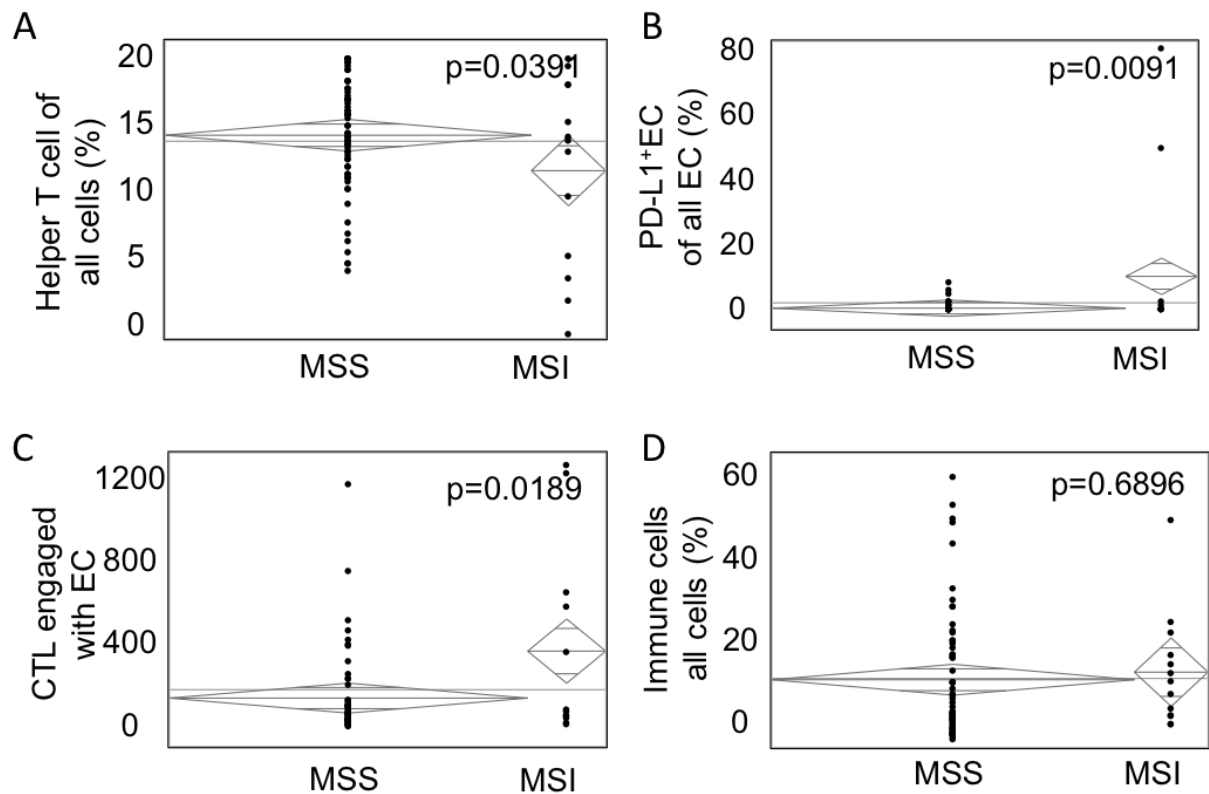

Supplemental Figure 5: *Characteristics of patient with microsatellite instability (MSI) and microsatellite stability (MSS)* A subset of 77 patient samples were subjected to immunohistochemistry (IHC) analysis and 13 determined to be deficient in one or more mismatch repair proteins. ANOVA was used to compare frequency of (A) helper T cells of total cells and (B) PD-L1<sup>+</sup> epithelial cells (ECs) of total ECs between MSS and MSI patients. (C) Difference in engagement of cytotoxic T lymphocyte (CTLs) with ECs and (D) total immune infiltrate was also examined by ANOVA.

| <b>Phenotype</b>                           | <b>Markers</b>                                       | <b>Color</b> |
|--------------------------------------------|------------------------------------------------------|--------------|
| PD-L1 <sup>-</sup> Epithelial cell         | PD-L1 <sup>-</sup><br>Pancytokeratin <sup>+</sup>    | White        |
| PD-L1 <sup>+</sup> Epithelial cell         | PD-L1 <sup>+</sup><br>Pancytokeratin <sup>+</sup>    | Light purple |
| Helper T cell                              | CD3 <sup>+</sup> CD8 <sup>-</sup> FoxP3 <sup>-</sup> | Green        |
| Cytotoxic T cell                           | CD3 <sup>+</sup> CD8 <sup>+</sup>                    | Yellow       |
| Regulatory T cell                          | CD3 <sup>+</sup> CD8 <sup>-</sup> FoxP3 <sup>+</sup> | Red          |
| PD-L1 <sup>-</sup> Antigen Presenting Cell | CD163 <sup>+</sup> PD-L1 <sup>-</sup>                | Orange       |
| PD-L1 <sup>+</sup> Antigen Presenting Cell | CD163 <sup>+</sup> PD-L1 <sup>+</sup>                | Magenta      |

Supplemental Table 1: *Multiplex fluorescent immunohistochemistry (mfIHC) allows for phenotyping and visualization of multiple different cell types in a single tissue core.*

|          | <b>%CTL of total</b> | <b>%Th of total</b> | <b>% APC of total</b> | <b>%PD-L1<sup>+</sup>APC of total</b> | <b>%EC of total</b> |
|----------|----------------------|---------------------|-----------------------|---------------------------------------|---------------------|
| Sample A | 27.7                 | 6.7                 | 46.9                  | 10.9                                  | 6.3                 |
| Core 1   | 4.9                  | 6.9                 | 18.5                  | 6.5                                   | 47.3                |
| Core 2   | 15.3                 | 10.9                | 53.3                  | 9.9                                   | 8.2                 |
| Core 3   |                      |                     |                       |                                       |                     |
| Sample B | 0.2                  | 5.6                 | 11.4                  | 0                                     | 67.0                |
| Core 1   | 0.7                  | 1.1                 | 3.3                   | 0.1                                   | 86.7                |
| Core 2   | 0                    | 1.1                 | 2.2                   | 0                                     | 85.4                |
| Core 3   |                      |                     |                       |                                       |                     |

Supplemental Table 2: *Variability of the immune microenvironment in cores taken from the same patient.*



| <b>Phenotype</b>       | <b>Distance (<math>\mu\text{m}</math>)</b> | <b>CI</b>     |
|------------------------|--------------------------------------------|---------------|
| PD-L1 <sup>+</sup> EC  | 181.9                                      | 158.5 - 205.4 |
| PD-L1 <sup>-</sup> EC  | 31.1                                       | 24.0 - 38.3   |
| Helper T cell          | 30.0                                       | 25.0 - 35.1   |
| Regulatory T cell      | 166.7                                      | 140.7 - 180.7 |
| PD-L1 <sup>-</sup> APC | 32.1                                       | 27.2 - 37.0   |
| PD-L1 <sup>+</sup> APC | 117.4                                      | 98 - 136.7    |

Supplemental Table 3: *Mean intercellular distance from cytotoxic T lymphocytes (CTLs) and neighboring cells.* After imaging and phenotyping, cells were assigned locations on x and y axes. Weighted mean distances between CTLs, Helper T cells, T<sub>regs</sub>, antigen presenting cells (APCs) and epithelial cells (ECs) was determined.

|                 | MSI<br>n=13 | MSS<br>n=64 | p value |
|-----------------|-------------|-------------|---------|
| Mean tumor size | 3.82cm      | 4.88cm      | 0.3120  |
| Numerous tumors | 7.69%       | 29.7%       | 0.0903  |
| DFI             | 18.7mos     | 16.6mos     | 0.6615  |

Supplemental Table 4: *Tumor characteristics of patients with and without microsatellite instability (MSI)*. There were no significant differences in largest tumor size or disease-free interval but a trend towards more numerous tumors

| PRIMARY ANTIBODY/ANTIGEN | COMPANY-CATALOGUE NUMBER | DILUTION | SECONDARY ANTIBODY | COMPANY-CATALOGUE NUMBER | OPAL TSA™ FLUOROPHORE |
|--------------------------|--------------------------|----------|--------------------|--------------------------|-----------------------|
| CD8                      | SpringBio-M5390          | 1:400    | Opal Polymer®      | ARH1A01EA                | 570                   |
| CD3                      | Dako-A0452               | 1:400    | Opal Polymer®      | ARH1A01EA                | 520                   |
| CD163                    | Leica-NCL-L-CD163        | 1:400    | Opal Polymer®      | ARH1A01EA                | 650                   |
| PDL1                     | CST-13684                | 1:200    | Opal Polymer®      | ARH1A01EA                | 540                   |
| Pancytokeratin           | Dako-M3515               | 1:500    | Opal Polymer®      | ARH1A01EA                | 690                   |
| FoxP3                    | CST-12653                | 1:400    | Opal Polymer®      | ARH1A01EA                | 620                   |

| FINAL PHENOTYPE                          | PRIMARY PHENOTYPE | SCORE for DATA ANALYSIS IN R |                  | SCORE for DATA ANALYSIS IN R   |                       |
|------------------------------------------|-------------------|------------------------------|------------------|--------------------------------|-----------------------|
|                                          |                   | ANTIBODY AND CELL SEGMENT    | SIGNAL INTENSITY | CELL SEGMENT                   | MEAN SIGNAL INTENSITY |
| PDL1 <sup>+</sup> tumor epithelial cells | Epithelial cells  | PDL1 cytoplasm               | 2-35             |                                |                       |
| PDL1 <sup>-</sup> tumor epithelial cells | Epithelial cells  |                              |                  | PDL1 cytoplasm                 | 2-35                  |
| PDL1 <sup>+</sup> APCs                   | APCs              | PDL1 cytoplasm               | 2-35             |                                |                       |
| PDL1 <sup>-</sup> APCs                   | APCs              |                              |                  | PDL1 cytoplasm                 | 2-35                  |
| Regulatory T cells (T <sub>reg</sub> S)  | T cells           | FoxP3 nucleus                | 3-50             | CD8 cytoplasm                  |                       |
| Cytotoxic T cells (CTLs)                 | T cells           | CD8 cytoplasm                | 3-50             |                                |                       |
| Helper T cells (Th)                      | T cells           |                              |                  | CD8 cytoplasm<br>FoxP3 nucleus | 3-50<br>3-50          |

Supplemental Table 5: *Antibody data* Data on antibodies used in multiplexed staining including primary, dilution, secondary and fluorophore. Description of cellular phenotypes is provided.
